# Supplementary material
Source: publisher figshare collection journal article supplement (https://acs.figshare.com/ndownloader/files/4745701)
Supplement: Supplementary file 1 [file 4745701]

## **SUPPORTING INFORMATION :**

### **Synthesis and Characterization of Poly(vinylidene fluoride)-*b*- poly(styrene) Block Copolymers by Iodine Transfer Polymerization.**

David Valade, Cyrille Boyer, Bruno Ameduri, Bernard Boutevin

Laboratoire de Chimie Macromoléculaire, UMR (CNRS) 5076, Ecole Nationale Supérieure  
de Chimie de Montpellier, 8 rue de l'Ecole Normale  
34296 Montpellier Cedex 05, France

## ITP of VDF

ITP is a process involving an iodinated transfer agent (R-I), a monomer (styrene in this present case), and a radical initiator (e.g. AIBN), the ratio  $[AIBN]/[R-I]$  being lower than unity. The initiating radicals,  $A^\bullet$ , are generated by thermal decomposition of a conventional initiator, such as AIBN, in step (1), (Scheme 1 in Supporting Information). Then,  $A^\bullet$  radicals can initiate the polymerization of monomer (such as styrene) as shown in step (2). The exchange of iodine from the transfer agent, R-I, to the propagating radical,  $P_n^\bullet$ , results in the formation of the polymeric alkyl iodide,  $P_n-I$ , and a new initiating radical,  $R^\bullet$ , as shown in step (4). The generated radical  $R^\bullet$  must be able to initiate the polymerization of the monomer (step (3)). Large differences in the stability of the reactants and products involved in step (4) could result in shifting the equilibrium overwhelmingly to the right or to the left. Therefore, the ideal case is when the structure of  $R^\bullet$  closely mimics the structure of the propagating radical, resulting in a thermodynamically neutral transfer step. The exchange process described in step (5) is thermodynamically neutral, because  $P_n^\bullet$  and  $P_m^\bullet$  propagating chains as well as  $P_n-I$  and  $P_m-I$  dormant chains have the same structure (which is commonly regarded for degenerative chain transfer). Both equilibriums (steps (4) and (5)) involving dormant and propagating species are crucial for the controlled/living behavior of the polymerization. As in any radical process, termination still occurs in ITP (step (6)), but the number of dead chains is kept low compared to the number of iodine-capped polymeric chains (living chains).

decomposition of initiator

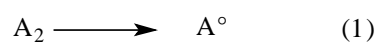

initiation :

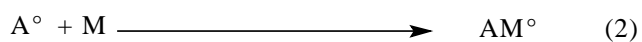

chain transfer :

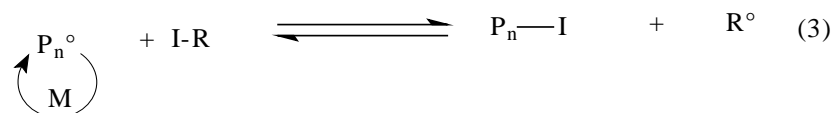

propagation :

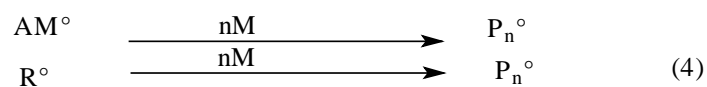

equilibrium between dormant and living species :

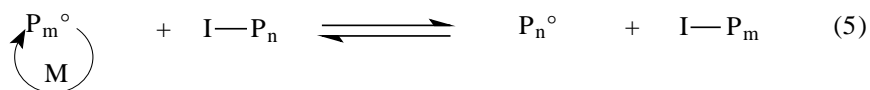

termination reaction

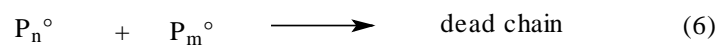

**Scheme 1.** Mechanism of iodine transfer polymerization of a M monomer in the presence of R-I and A<sub>2</sub> as chain transfer agent and initiator, respectively.

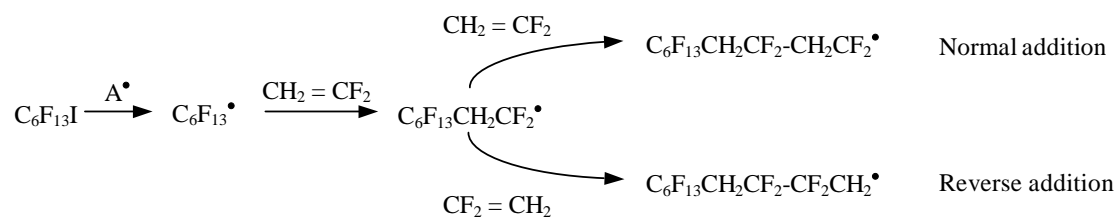

**Scheme 2.** Different reactions that occur in iodine transfer polymerization (ITP) of vinylidene fluoride (VDF).

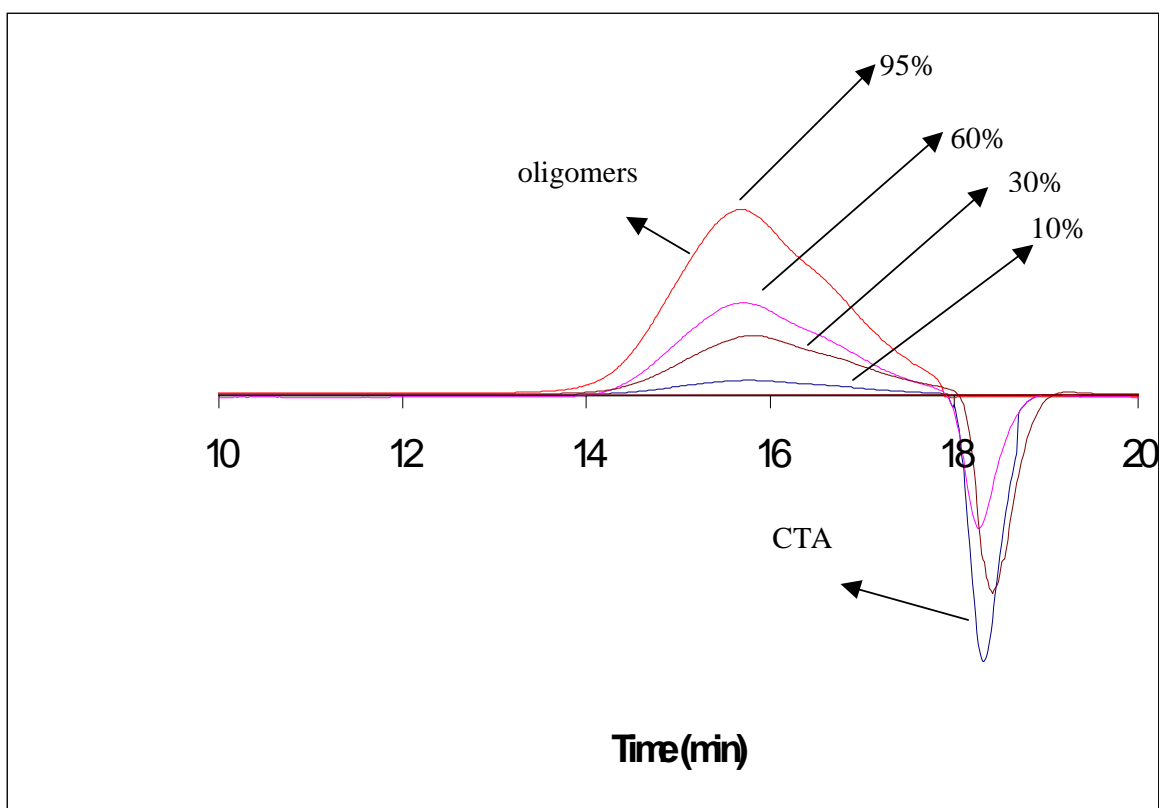

**Figure 1.** SEC chromatograms of oligomers obtained by Iodine Transfer Polymerization (ITP) of styrene in the presence of  $C_6F_{13}CH_2CF_2I$ , as the Chain Transfer Agent and Azobisisobutyronitrile (AIBN), as the initiator at 70 °C.

% represents the styrene conversions.

*Experimental Conditions:*  $[Styrene]_0 : [C_6F_{13}-CH_2CF_2I]_0 : [Initiator]_0 = 100.00 : 2.50 : 0.25$  at 70 °C in acetonitrile.

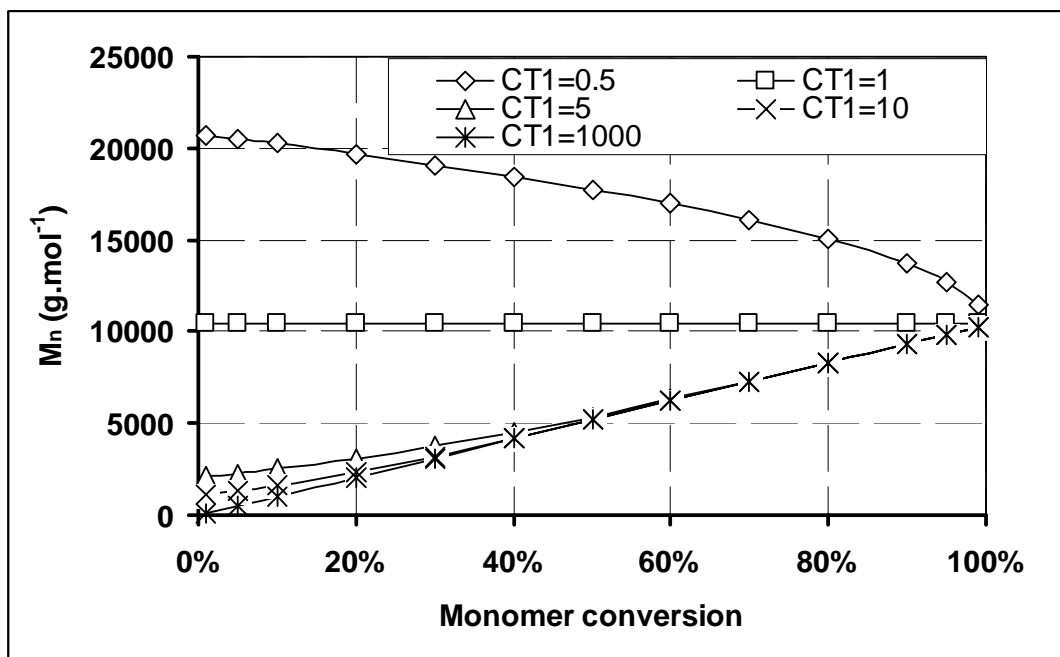

**Figure 2.** Evolution of molecular weight  $M_n$  *versus* the monomer conversion for different values of transfer constant,  $CT_1$ , according to the equation  $M_n = (p[M]_0 M_{\text{monomer}}) / ([CTA]_0 (1 - (1 - p)^{CT_1}))$  (conditions:  $[M]_0/[CTA]_0 = 100$ ,  $M_{\text{monomer}} = 104 \text{ g.mol}^{-1}$ ).

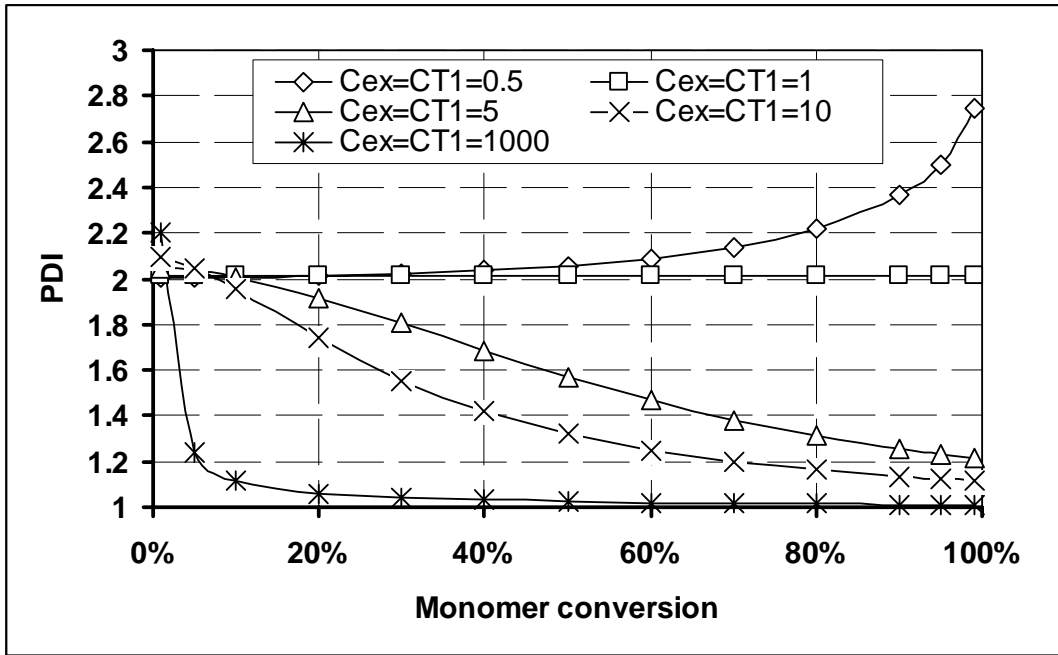

**Figure 3.** Evolution of polydispersity index (PDI) with monomer conversion for different values of degenerative transfer constant,  $C_{ex}$ , in the particular case where  $C_{ex}=C_{T1}$ , according to the equation  $PDI=(1+([M]_0/[CTA]_0)(2+(2-p)(1-C_{ex})/C_{ex}))/((p[M]_0)/([CTA]_0(1-(1-p)^{C_{ex}})))$  (conditions:  $[M]_0/[CTA]_0=100$ ).

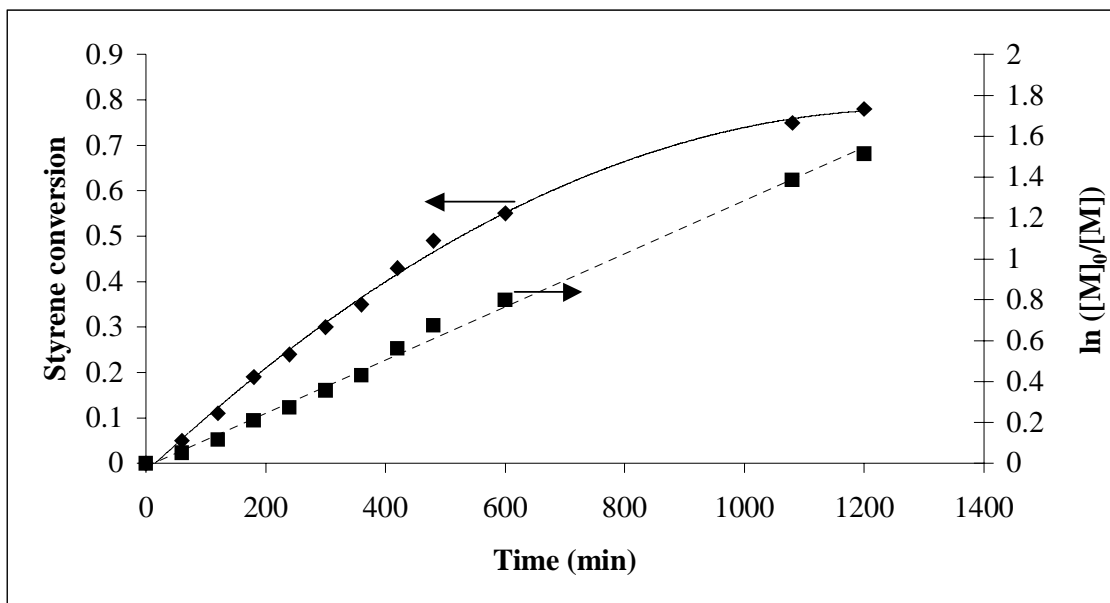

**Figure 4.** Styrene conversion and  $\ln [M]_0 / [M]$  versus time for iodine transfer polymerization of styrene, initiated with azobisisobutyronitrile (AIBN) and in the presence of  $C_6F_{13}-CH_2-CF_2-I$  as the chain transfer agent (CTA) performed at 70 °C.

*Experimental Conditions:*  $[Styrene]_0:[C_6F_{13}-CH_2CF_2-I]_0:[Initiator]_0 = 100.00:2.50:0.25$  at 70 °C in acetonitrile.



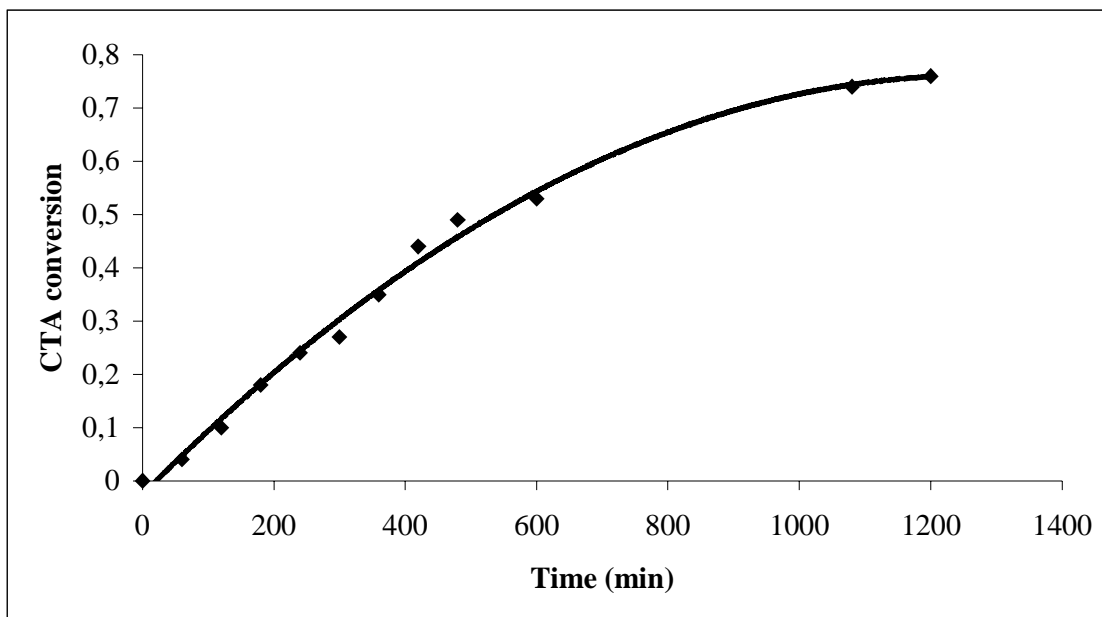

**Figure 5.** Evolution of the  $\text{C}_6\text{F}_{13}\text{-CH}_2\text{CF}_2\text{I}$  (chain transfer agent, CTA) consumptions *versus* time for the iodine transfer polymerization (ITP) of styrene initiated by azobisisobutyronitrile (AIBN) at 70 °C.

*Experimental Conditions: Iodine transfer polymerization (ITP) of styrene performed in the presence of  $[\text{Styrene}]_0: [\text{C}_6\text{F}_{13}\text{-I}]_0: [\text{AIBN}]_0 = 100.00:2.50:0.25$  at 70 °C in acetonitrile.*

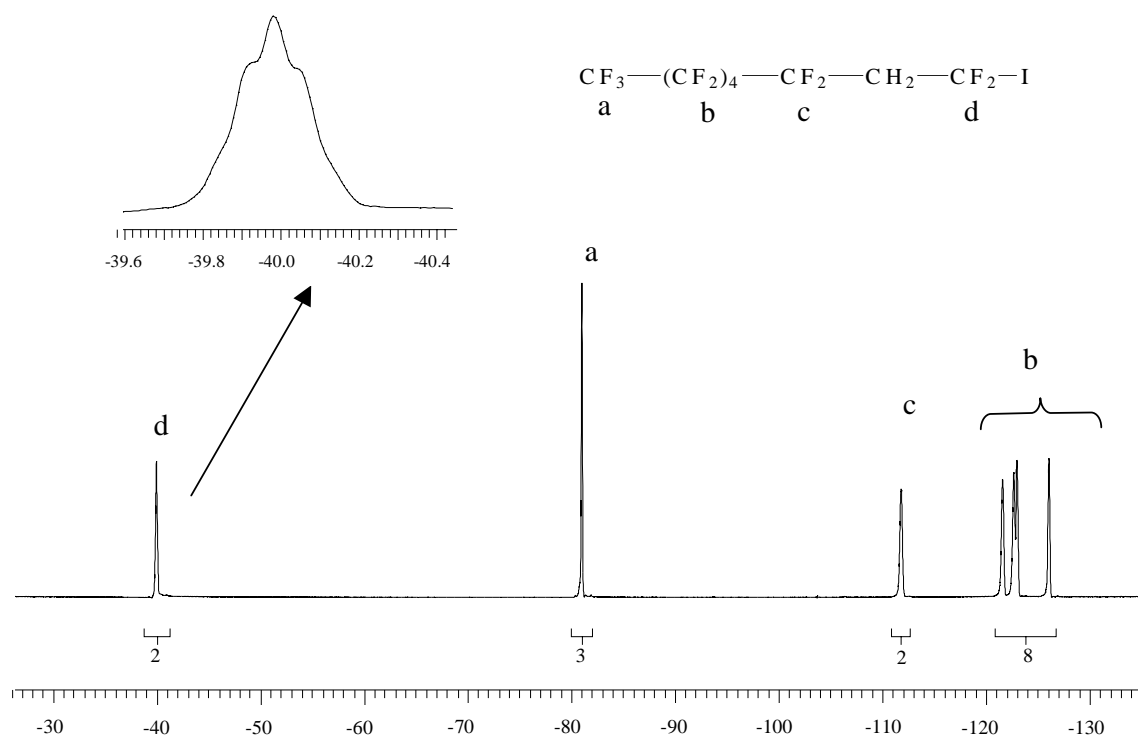

**Figure 6.**  $^{19}\text{F}$  NMR spectrum of monoadduct  $\text{C}_6\text{F}_{13}\text{---}(\text{CH}_2\text{CF}_2)_1\text{---I}$  (200 MHz, 298 K), recorded in  $\text{CDCl}_3$ .

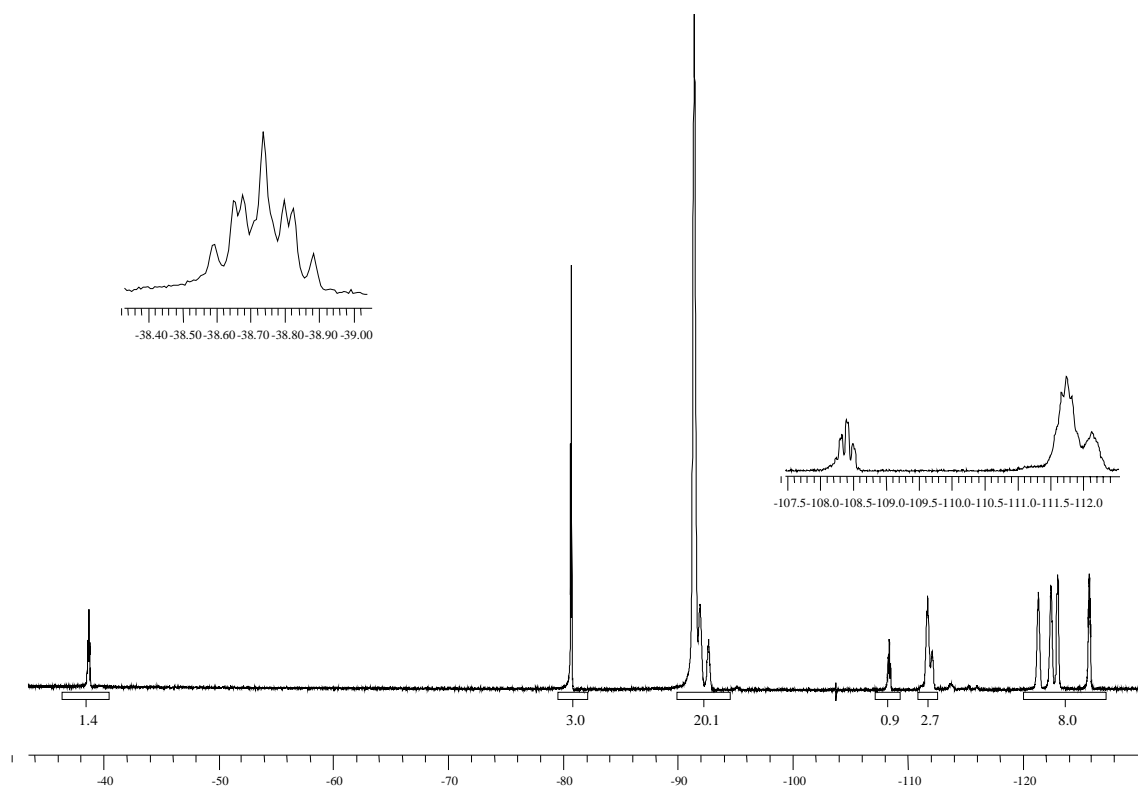

**Figure 7.**  $^{19}\text{F}$  NMR spectrum of the poly(vinylidene fluoride)-I (recorded in deuterated acetone) (Average degree of polymerization ( $\overline{\text{DP}}_n$ ) = 10) obtained by ITP of vinylidene fluoride (VDF) with  $\text{C}_6\text{F}_{13}\text{I}$ .

*Experimental conditions of Iodine Transfer Polymerization of vinylidene fluoride with  $\text{C}_6\text{F}_{13}\text{I}$  initiated by tert-butylperoxide pivalate at 75 °C in 1,1,1,3,3-pentafluorobutane :  $[\text{VDF}]_0 : [\text{C}_6\text{F}_{13}\text{I}]_0 : [\text{Tert-butylperoxypivalate}]_0 = 100.0 : 10.0 : 0.6$  at 75 °C.*

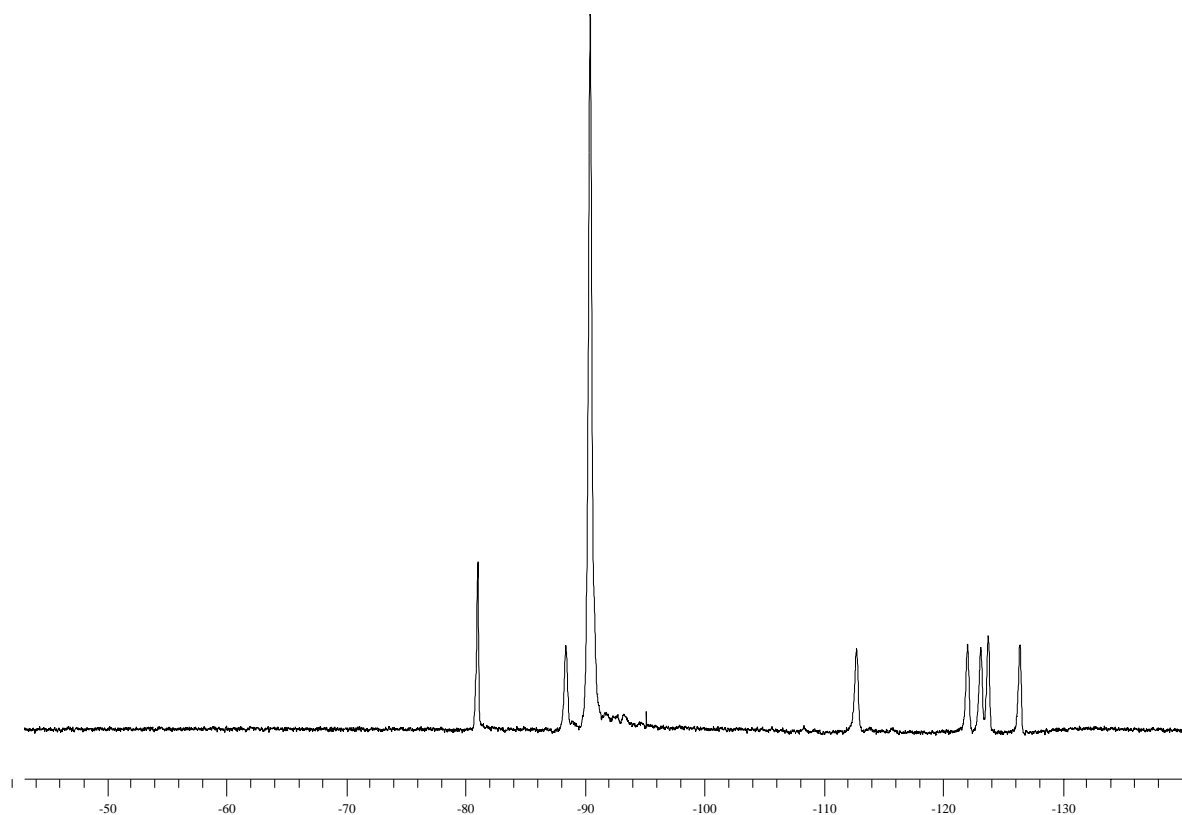

**Figure 8.**  $^{19}\text{F}$  NMR spectrum of  $\text{C}_6\text{F}_{13}-(\text{CH}_2-\text{CF}_2)_{10}-(\text{PS})_{60}\text{-I}$  block copolymers obtained by iodine transfer polymerization (ITP) of styrene with  $\text{C}_6\text{F}_{13}-(\text{CH}_2-\text{CF}_2)_{10}\text{-I}$ , as the macromolecular chain transfer agent (400 MHz, deuterated DMF).

*Experimental Conditions: Iodine transfer polymerization (ITP) of styrene performed in the presence of macro Chain Transfer Agent at 70 °C in acetonitrile  $[\text{Styrene}]_0:[\text{C}_6\text{F}_{13}-(\text{CH}_2-\text{CF}_2)_{10}\text{-I}]_0:[\text{AIBN}]_0 = 100.0:1.5:1.0$ .*

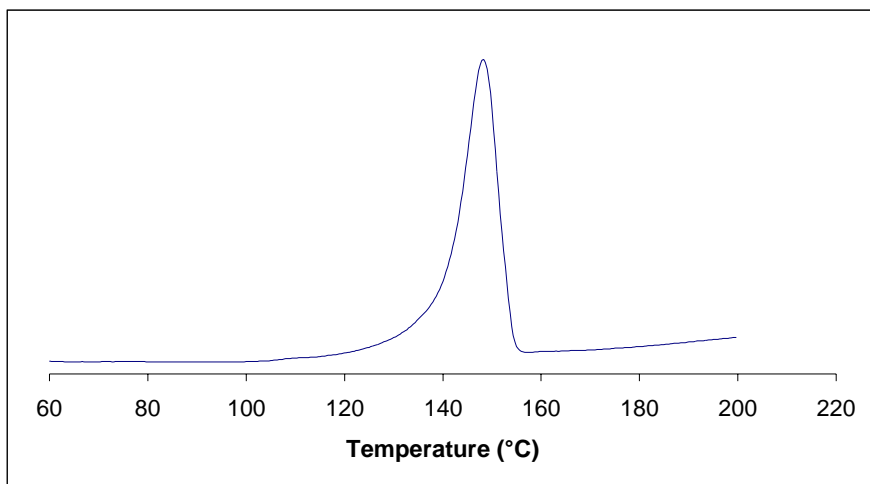

**Figure 9.** DSC Thermogram of  $\text{C}_6\text{F}_{13}\text{-(VDF)}_{20}\text{-I}$ .

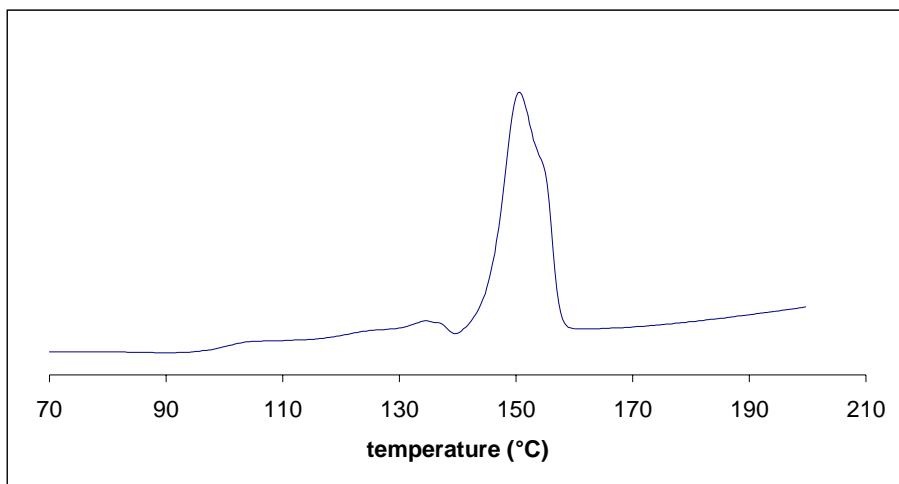

**Figure 10.** DSC Thermogram of  $C_6F_{13}-(VDF)_{20}-(styrene)_{25}-I$  (copo1).

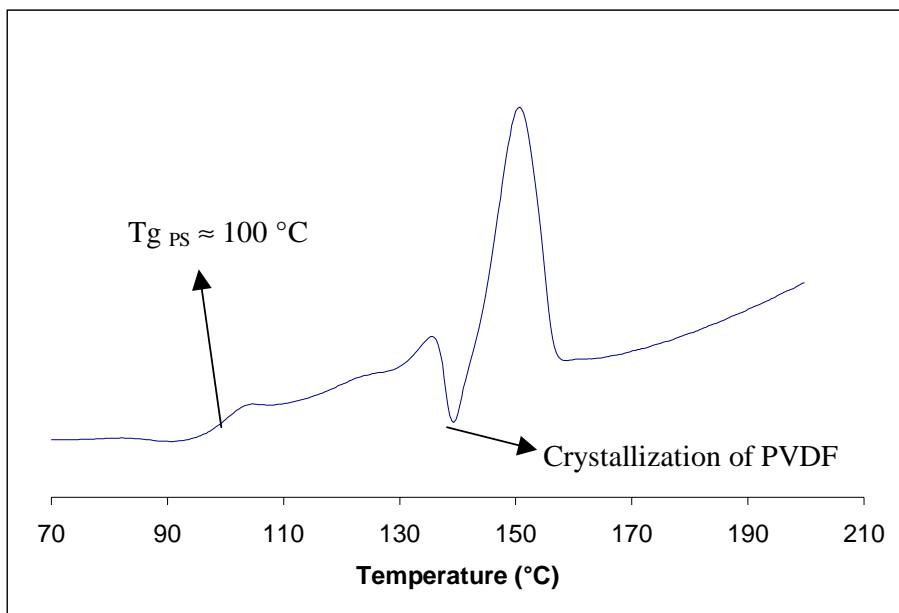

**Figure 11.** DSC thermogram of  $C_6F_{13}-(VDF)_{20}-(styrene)_{65}-I$  (copo 2).

| CTA<br>[CTA] <sub>0</sub> = 0.1M | Initiator<br>[Ini] <sub>0</sub> =<br>0.1M | Temp<br>(°C) | Time<br>(hrs) | Conv.<br>(%) | Mn<br>theo/found<br>(g/mol) | PDI | Ref. |
|----------------------------------|-------------------------------------------|--------------|---------------|--------------|-----------------------------|-----|------|
| None                             | AIBN                                      | 70           | 6             | 86           | 65500                       | 3.7 | [1]  |
|                                  | BPO                                       | 80           | 3             | 97           | 40500                       | 2.1 | [1]  |
| 1-PEI                            | AIBN                                      | 70           | 16            | 94           | 6580/7810                   | 1.5 | [1]  |
|                                  | AIBN                                      | 50           | 39            | 92           | 6500/7830                   | 1.4 | [1]  |
|                                  | AIBN                                      | 90           | 2             | 52           | 3670/5840                   | 1.5 | [1]  |
|                                  | BPO                                       | 80           | 4             | 83           | 6570/7280                   | 1.4 | [1]  |
| Iodomethane                      | BPO                                       | 80           | 3             | 93           | 7380/34500                  | 2.1 | [1]  |
| Diiodomethane                    | BPO                                       | 80           | 5             | 91           | 7250/20140                  | 2.0 | [1]  |
| Iodoform                         | BPO                                       | 80           | 5             | 80           | 6360/5120                   | 1.4 | [1]  |
| Carbon tetraiodide               | BPO                                       | 80           | 5             | 31           | 2480/390                    | 1.0 | [1]  |
| <i>n</i> -propyl iodide          | BPO                                       | 80           | 3             | 99           | 7420/34050                  | 2.2 | [1]  |
| Isopropyl iodide                 | BPO                                       | 80           | 3             | 86           | 6460/33730                  | 2.0 | [1]  |
| <i>Tert</i> -butyl iodide        | BPO                                       | 80           | 4             | 57           | 4300/25540                  | 2.0 | [1]  |
| Perfluorohexyl<br>iodide         | BPO                                       | 80           | 4             | 94           | 7440/11200                  | 1.5 | [2]  |
| Iodobenzene                      | BPO                                       | 80           | 4             | 98           | 8260/29700                  | 2.0 | [1]  |
| 1,4-diiodobenzene                | BPO                                       | 80           | 4             | 77           | 6050/33620                  | 2.0 | [1]  |
| iodoacetonitrile                 | BPO                                       | 80           | 4             | 83           | 6550/5800                   | 1.4 | [1]  |

**Table 1.** Use of various alkyl iodides for the bulk polymerization of styrene ([Sty]<sub>0</sub>=1M).

*PDI, AIBN, BPO and 1-PEI stand for polydispersity index, azobisisobutyronitrile and dibenzoyl peroxide, 1-phenyl ethyl iodide, respectively.*



| Runs | $M_n$ of PVDF block<br>(g mol <sup>-1</sup> ) | $M_n$ of PS block<br>(g mol <sup>-1</sup> ) | $T_m$ (°C) | Enthalpy<br>(J g <sup>-1</sup> ) | $T_g$ (°C) |
|------|-----------------------------------------------|---------------------------------------------|------------|----------------------------------|------------|
| 21   | 1,020                                         | -                                           | 150        | 66                               | -          |
| 22   | 1,020                                         | 2,500                                       | 149        | 58                               | 90         |
| 23   | 1,020                                         | 3,300                                       | 149        | 30                               | 92         |
| 24   | 1,020                                         | 5,100                                       | 147        | 25                               | 94         |
| 25   | 1,020                                         | 6,900                                       | 145        | 13                               | 94         |

**Table 2.** Summary of the thermal properties of PVDF-b-PS block copolymers.

References:

1. Gaynor, S.G.; Wang J.-S.; Matyjaszewski K. *Macromolecules* **1995**, 28, 8051-8056.
2. Lansalot, M.; Farcet, C.; Charleux, B.; Vairon J.-P.; Pirri R. *Macromolecules* **1999**, 32, 7354-7360
